# Supplementary material for: Knowledge of University Students in Health Care Settings on Vaccines and Vaccinations Strategies: Impact Evaluation of a Specific Educational Training Course during the COVID-19 Pandemic Period in Italy
Source: MDPI journal article supplement (doi:10.3390/vaccines10071085), 2022-07-06
Supplement: s1 [file s1]

**Table S1.** Topic “Knowledge about vaccines”: test results pre- e post-course.

| Questions n. 1-3                                                                                           | Answers   | Pharmacy            |                      | Medicine            |                      | Hygiene             |                      | <i>p-value</i> * | <i>p-value</i> ** |
|------------------------------------------------------------------------------------------------------------|-----------|---------------------|----------------------|---------------------|----------------------|---------------------|----------------------|------------------|-------------------|
|                                                                                                            |           | Pre-course<br>N (%) | Post-course<br>N (%) | Pre-course<br>N (%) | Post-course<br>N (%) | Pre-course<br>N (%) | Post-course<br>N (%) |                  |                   |
| Vaccines:                                                                                                  | Incorrect | 52 (31.71)          | 10 (6.10)            | 95 (36.40)          | 7 (2.68)             | 6 (26.09)           | -                    | 0.430            | 0.124             |
| • <i>Are biological preparations;</i>                                                                      | Correct   | 112 (68.29)         | 154 (93.90)          | 166 (63.60)         | 254 (97.32)          | 17 (73.91)          | 23 (100)             |                  |                   |
| • <i>Are comparable in all respects to drugs;</i>                                                          | Missing   | 1 (0.60)            | 1 (0.60)             | -                   | -                    | -                   | -                    |                  |                   |
| • <i>Allow to treat people;</i>                                                                            |           |                     |                      |                     |                      |                     |                      |                  |                   |
| • All act only at the level of the individual vaccinated subject.                                          |           |                     |                      |                     |                      |                     |                      |                  |                   |
| Combined vaccines are:                                                                                     | Incorrect | 25 (15.24)          | 3 (1.82)             | 23 (8.81)           | 2 (0.77)             | 1 (4.35)            | -                    | 0.069            | 0.525             |
| • Produced using the recombinant DNA technique;                                                            | Correct   | 139 (84.76)         | 162 (98.18)          | 238 (91.19)         | 259 (99.23)          | 22 (95.65)          | 23 (100)             |                  |                   |
| • Different vaccines administered in the same vaccination session but in different anatomical sites;       |           |                     |                      |                     |                      |                     |                      |                  |                   |
| • <i>Are constituted by the merging of several antigens or different vaccines in a single preparation;</i> | Missing   | 1 (0.60)            | -                    | -                   | -                    | -                   | -                    |                  |                   |
| • Very effective but unfortunately they always result in an exponential increase in adverse events.        |           |                     |                      |                     |                      |                     |                      |                  |                   |
| Flu vaccines actually available in Italy are:                                                              | Incorrect | 81 (49.39)          | 18 (10.98)           | 80 (30.65)          | 5 (1.92)             | 2 (8.70)            | -                    | 0.000            | 0.000             |
| • <i>Split virus. Sub-units and live attenuated virus;</i>                                                 | Correct   | 83 (50.61)          | 146 (89.02)          | 181 (69.35)         | 256 (98.08)          | 21 (91.30)          | 23 (100)             |                  |                   |
| • Whole inactivated virus;                                                                                 | Missing   | 1 (0.60)            | 1 (0.60)             | -                   | -                    | -                   | -                    |                  |                   |
| • Based on anatoxins;                                                                                      |           |                     |                      |                     |                      |                     |                      |                  |                   |
| • Based on polysaccharides.                                                                                |           |                     |                      |                     |                      |                     |                      |                  |                   |

Correct answers are in italics. \* Difference in the distribution of correct/incorrect answers between Faculties pre-course. \*\* Difference in the distribution of correct/incorrect answers between Faculties post-course.

**Table S2.** Topic “COVID-19 vaccines”: test results pre- e post-course.

| Questions n. 4-6                                                                                                                                    | Answers   | Pharmacy            |                      | Medicine            |                      | Hygiene             |                      | <i>p-value</i> * | <i>p-value</i> ** |
|-----------------------------------------------------------------------------------------------------------------------------------------------------|-----------|---------------------|----------------------|---------------------|----------------------|---------------------|----------------------|------------------|-------------------|
|                                                                                                                                                     |           | Pre-course<br>N (%) | Post-course<br>N (%) | Pre-course<br>N (%) | Post-course<br>N (%) | Pre-course<br>N (%) | Post-course<br>N (%) |                  |                   |
| What was the first Sars-CoV-2 vaccine to be approved by EMA?                                                                                        | Incorrect | 6 (3.66)            | -                    | 3 (1.15)            | 2 (0.77)             | -                   | -                    | 0.156            | 0.485             |
| • Oxford-Astrazeneca;                                                                                                                               | Correct   | 158 (96.34)         | 165 (100)            | 258 (98.85)         | 259 (99.23)          | 23 (100)            | 23 (100)             |                  |                   |
| • Moderna;                                                                                                                                          | Missing   | 1 (0.60)            | -                    | -                   | -                    | -                   | -                    |                  |                   |
| • <i>Pfizer-Biontech;</i>                                                                                                                           |           |                     |                      |                     |                      |                     |                      |                  |                   |
| • Sanofi-GSK;                                                                                                                                       |           |                     |                      |                     |                      |                     |                      |                  |                   |
| • J&J (Johnson & Johnson).                                                                                                                          |           |                     |                      |                     |                      |                     |                      |                  |                   |
| The Pfizer-Biontech vaccine differs from the Moderna vaccine in one of the following options:                                                       | Incorrect | 66 (40)             | 13 (7.93)            | 64 (24.52)          | 8 (3.07)             | 1 (4.35)            | -                    | 0.000            | 0.038             |
| • It does not need to be reconstituted with the physiological solution. unlike the Moderna vaccine which must be reconstituted;                     | Correct   | 99 (60)             | 151 (92.07)          | 197 (75.48)         | 253 (96.03)          | 22 (95.65)          | 23 (100)             |                  |                   |
| • It exploits the mechanism of messenger RNA (mRNA). unlike the Moderna which is made up of purified antigens;                                      | Missing   | -                   | 1 (0.60)             | -                   | -                    | -                   | -                    |                  |                   |
| • <i>An interval of at least 21 days between the first and the second dose is required. unlike Moderna vaccine which requires at least 28 days;</i> |           |                     |                      |                     |                      |                     |                      |                  |                   |
| • It cannot be administered to subjects over 55 years of age;                                                                                       |           |                     |                      |                     |                      |                     |                      |                  |                   |
| • None of the above.                                                                                                                                |           |                     |                      |                     |                      |                     |                      |                  |                   |
| How many doses of Pfizer-Biontech vaccine can be obtained from each vial. according to the latest AIFA legislation?                                 | Incorrect | 57 (34.76)          | 2 (1.21)             | 63 (24.14)          | 1 (0.38)             | 1 (4.35)            | -                    | 0.002            | 0.546             |
| • 1 dose;                                                                                                                                           | Correct   | 107 (65.24)         | 163 (98.79)          | 198 (75.86)         | 260 (99.62)          | 22 (95.65)          | 23 (100)             |                  |                   |
| • 3 doses;                                                                                                                                          | Missing   | 1 (0.60)            | -                    | -                   | -                    | -                   | -                    |                  |                   |
| • 6 doses;                                                                                                                                          |           |                     |                      |                     |                      |                     |                      |                  |                   |
| • 5 doses;                                                                                                                                          |           |                     |                      |                     |                      |                     |                      |                  |                   |
| • 4 doses.                                                                                                                                          |           |                     |                      |                     |                      |                     |                      |                  |                   |

Correct answers are in italics. \* Difference in the distribution of correct/incorrect answers between Faculties pre-course. \*\* Difference in the distribution of correct/incorrect answers between Faculties post-course.

**Table S3.** Topic “Vaccine development”: test results pre- e post-course.

| Questions n. 7-9                                                               | Answers   | Pharmacy            |                      | Medicine            |                      | Hygiene             |                      | <i>p-value</i> * | <i>p-value</i> ** |
|--------------------------------------------------------------------------------|-----------|---------------------|----------------------|---------------------|----------------------|---------------------|----------------------|------------------|-------------------|
|                                                                                |           | Pre-course<br>N (%) | Post-course<br>N (%) | Pre-course<br>N (%) | Post-course<br>N (%) | Pre-course<br>N (%) | Post-course<br>N (%) |                  |                   |
| Development phases of drugs and vaccines in which safety is also assessed are: | Incorrect | 66 (40)             | 13 (7.88)            | 81 (31.03)          | 9 (3.45)             | 4 (17.39)           | -                    | 0.039            | 0.064             |
| • Phases 1 and 2;                                                              | Correct   | 99 (60)             | 152 (92.12)          | 180 (68.97)         | 252 (96.55)          | 19 (82.61)          | 23 (100)             |                  |                   |
| • Phases 2 and 3;                                                              | Missing   | -                   | -                    | -                   | -                    | -                   | -                    |                  |                   |
| • Phase 4;                                                                     |           |                     |                      |                     |                      |                     |                      |                  |                   |
| • <i>All of them.</i>                                                          |           |                     |                      |                     |                      |                     |                      |                  |                   |
| The selection of adjuvants is performed:                                       | Incorrect | 77 (47.24)          | 30 (18.40)           | 133 (50.96)         | 28 (10.73)           | 9 (39.13)           | 3 (13.64)            | 0.473            | 0.082             |
| • <i>In the preclinical phase;</i>                                             | Correct   | 86 (52.76)          | 133 (81.60)          | 128 (49.04)         | 233 (89.27)          | 14 (60.87)          | 19 (86.36)           |                  |                   |
| • In phase 1-2;                                                                | Missing   | 2 (1.21)            | 2 (1.21)             | -                   | -                    | -                   | 1 (4.35)             |                  |                   |
| • In phase 3;                                                                  |           |                     |                      |                     |                      |                     |                      |                  |                   |
| • After vaccine authorisation.                                                 |           |                     |                      |                     |                      |                     |                      |                  |                   |
| The first legislative rules on the development of vaccines date back to:       | Incorrect | 133 (81.60)         | 67 (41.10)           | 185 (70.88)         | 42 (16.09)           | 14 (63.64)          | 15 (68.18)           | 0.024            | 0.000             |
| • 1950;                                                                        | Correct   | 30 (18.40)          | 96 (58.90)           | 76 (29.12)          | 219 (83.91)          | 8 (36.36)           | 7 (31.82)            |                  |                   |
| • 1970;                                                                        | Missing   | 2 (1.21)            | 2 (1.21)             | -                   | -                    | 1 (4.35)            | 1 (4.35)             |                  |                   |
| • 1902;                                                                        |           |                     |                      |                     |                      |                     |                      |                  |                   |
| • 1802.                                                                        |           |                     |                      |                     |                      |                     |                      |                  |                   |

Correct answers are in italics. \* Difference in the distribution of correct/incorrect answers between Faculties pre-course. \*\* Difference in the distribution of correct/incorrect answers between Faculties post-course.

**Table S4.** Topic “COVID-19 vaccine development”: test results pre- e post-course.

| Questions n. 10-12                                                                        | Answers   | Pharmacy            |                      | Medicine            |                      | Hygiene             |                      | <i>p-value</i> * | <i>p-value</i> ** |
|-------------------------------------------------------------------------------------------|-----------|---------------------|----------------------|---------------------|----------------------|---------------------|----------------------|------------------|-------------------|
|                                                                                           |           | Pre-course<br>N (%) | Post-course<br>N (%) | Pre-course<br>N (%) | Post-course<br>N (%) | Pre-course<br>N (%) | Post-course<br>N (%) |                  |                   |
| Which of these is one of the main ethical challenges in vaccination against SARS-Cov-2?   | Incorrect | 100 (61.73)         | 43 (26.38)           | 108 (41.38)         | 11 (4.21)            | 4 (17.39)           | -                    | 0.000            | 0.000             |
| • Splitting of the doses;                                                                 | Correct   | 62 (38.27)          | 120 (73.62)          | 153 (58.62)         | 250 (95.79)          | 19 (82.61)          | 23 (100)             |                  |                   |
| • Adverse effects;                                                                        | Missing   | 3 (1.82)            | 2 (1.21)             | -                   | -                    | -                   | -                    |                  |                   |
| • mRNA technology;                                                                        |           |                     |                      |                     |                      |                     |                      |                  |                   |
| • <i>Social inequalities.</i>                                                             |           |                     |                      |                     |                      |                     |                      |                  |                   |
| Which groups of subjects were excluded from pre-marketing testing of SARS-Cov-2 vaccines? | Incorrect | 26 (15.85)          | 5 (3.05)             | 42 (16.19)          | 3 (1.15)             | -                   | -                    | 0.144            | 0.285             |
| • <i>Pregnant and breastfeeding women;</i>                                                | Correct   | 138 (84.15)         | 159 (96.95)          | 219 (83.91)         | 258 (98.85)          | 23 (100)            | 23 (100)             |                  |                   |
| • Developing countries;                                                                   | Missing   | 1 (0.60)            | 1 (0.60)             | -                   | -                    | -                   | -                    |                  |                   |
| • Elderly people;                                                                         |           |                     |                      |                     |                      |                     |                      |                  |                   |
| • Obese patients.                                                                         |           |                     |                      |                     |                      |                     |                      |                  |                   |
| Authorisation of the Comirnaty vaccine has been granted:                                  | Incorrect | 129 (80.63)         | 131 (79.88)          | 206 (78.93)         | 37 (14.18)           | 16 (69.57)          | 6 (26.09)            | 0.474            | 0.000             |
| • <i>Firstly from the MHRA in the UK;</i>                                                 | Correct   | 31 (19.38)          | 33 (20.12)           | 55 (21.07)          | 224 (85.82)          | 7 (30.43)           | 17 (73.91)           |                  |                   |
| • Simultaneously on a global level;                                                       | Missing   | 5 (3.05)            | 1 (0.60)             | -                   | -                    | -                   | -                    |                  |                   |
| • Firstly by the FDA in the USA;                                                          |           |                     |                      |                     |                      |                     |                      |                  |                   |
| • First. the Chinese government.                                                          |           |                     |                      |                     |                      |                     |                      |                  |                   |

Correct answers are in italics. \* Difference in the distribution of correct/incorrect answers between Faculties pre-course. \*\* Difference in the distribution of correct/incorrect answers between Faculties post-course.

**Table S5.** Topic “Quality Control (QC) and GMPs”: test results pre- e post-course.

| Questions n. 13-15                                                                     | Answers   | Pharmacy            |                      | Medicine            |                      | Hygiene             |                      | <i>p-value</i> * | <i>p-value</i> ** |
|----------------------------------------------------------------------------------------|-----------|---------------------|----------------------|---------------------|----------------------|---------------------|----------------------|------------------|-------------------|
|                                                                                        |           | Pre-course<br>N (%) | Post-course<br>N (%) | Pre-course<br>N (%) | Post-course<br>N (%) | Pre-course<br>N (%) | Post-course<br>N (%) |                  |                   |
| How is the Quality Unit structured?                                                    | Incorrect | 44 (26.83)          | 4 (2.42)             | 120 (45.98)         | 6 (2.30)             | 6 (26.09)           | 2 (8.70)             | 0.000            | 0.184             |
| • <i>Quality Control + Quality Assurance;</i>                                          | Correct   | 120 (73.17)         | 161 (97.58)          | 141 (54.02)         | 255 (97.70)          | 17 (73.91)          | 21 (91.30)           |                  |                   |
| • Quality Control + Pharmacovigilance;                                                 | Missing   | 1 (0.60)            | -                    | -                   | -                    | -                   | -                    |                  |                   |
| • Quality Assurance + Device Monitoring;                                               |           |                     |                      |                     |                      |                     |                      |                  |                   |
| • <i>None of the above.</i>                                                            |           |                     |                      |                     |                      |                     |                      |                  |                   |
| GMP stands for:                                                                        | Incorrect | 116 (70.30)         | 108 (65.45)          | 147 (56.32)         | 44 (16.86)           | 11 (47.83)          | 9 (39.13)            | 0.006            | 0.000             |
| • Standards of good manufacturing;                                                     | Correct   | 49 (29.70)          | 57 (43.55)           | 114 (43.68)         | 217 (83.14)          | 12 (52.17)          | 14 (60.87)           |                  |                   |
| • Good Manufacturing Practices;                                                        | Missing   | -                   | -                    | -                   | -                    | -                   | -                    |                  |                   |
| • Standards of good production practice;                                               |           |                     |                      |                     |                      |                     |                      |                  |                   |
| • <i>All the above.</i>                                                                |           |                     |                      |                     |                      |                     |                      |                  |                   |
| The materials for the production of a vaccine:                                         | Incorrect | 11 (6.79)           | 3 (1.83)             | 15 (5.75)           | 4 (1.53)             | -                   | 1 (4.35)             | 0.428            | 0.619             |
| • Include only the raw materials purchased;                                            | Correct   | 151 (93.21)         | 161 (98.17)          | 246 (94.25)         | 257 (98.47)          | 23 (100)            | 22 (95.65)           |                  |                   |
| • <i>Are analysed upon arrival and stored at controlled temperature and humidity;</i>  | Missing   | 3 (1.83)            | 1 (0.60)             | -                   | -                    | -                   | -                    |                  |                   |
| • Include only packaging materials;                                                    |           |                     |                      |                     |                      |                     |                      |                  |                   |
| • Are not analysed upon arrival and are stored at controlled temperature and humidity. |           |                     |                      |                     |                      |                     |                      |                  |                   |

Correct answers are in italics. \* Difference in the distribution of correct/incorrect answers between Faculties pre-course. \*\* Difference in the distribution of correct/incorrect answers between Faculties post-course.

**Table S6.** Topic “Vaccines in community pharmacy”: test results pre- e post-course.

| Questions n. 16-18                                                                                   | Answers   | Pharmacy            |                      | Medicine            |                      | Hygiene             |                      | <i>p-value</i> * | <i>p-value</i> ** |
|------------------------------------------------------------------------------------------------------|-----------|---------------------|----------------------|---------------------|----------------------|---------------------|----------------------|------------------|-------------------|
|                                                                                                      |           | Pre-course<br>N (%) | Post-course<br>N (%) | Pre-course<br>N (%) | Post-course<br>N (%) | Pre-course<br>N (%) | Post-course<br>N (%) |                  |                   |
| In the pharmacy vaccines can be found:                                                               | Incorrect | 111 (67.68)         | 93 (56.36)           | 148 (56.70)         | 26 (9.96)            | 10 (42.48)          | 5 (21.74)            | 0.020            | 0.000             |
| • Only in the refrigerator;                                                                          | Correct   | 53 (32.32)          | 72 (43.64)           | 113 (43.30)         | 235 (90.04)          | 13 (56.52)          | 18 (78.26)           |                  |                   |
| • Only outside the refrigerator;                                                                     | Missing   | 1 (0.60)            | -                    | -                   | -                    | -                   | -                    |                  |                   |
| • <i>Either in or out of the refrigerator;</i>                                                       |           |                     |                      |                     |                      |                     |                      |                  |                   |
| • All the above.                                                                                     |           |                     |                      |                     |                      |                     |                      |                  |                   |
| The most frequent temperature range for thermolabile vaccines is:                                    | Incorrect | 48 (29.45)          | 2 (1.21)             | 63 (24.14)          | 7 (2.68)             | 1 (4.35)            | -                    | 0.030            | 0.453             |
| • Below -15°C;                                                                                       | Correct   | 115 (70.55)         | 163 (98.79)          | 198 (75.86)         | 254 (97.32)          | 22 (95.65)          | 22 (100)             |                  |                   |
| • <i>Between 2°C and 8°C;</i>                                                                        | Missing   | 2 (1.21)            | -                    | -                   | -                    | -                   | 1 (4.35)             |                  |                   |
| • Between 8°C and 15°C;                                                                              |           |                     |                      |                     |                      |                     |                      |                  |                   |
| • Between 15°C and 25°C.                                                                             |           |                     |                      |                     |                      |                     |                      |                  |                   |
| The cold chain includes:                                                                             | Incorrect | 55 (33.54)          | 29 (17.68)           | 38 (14.56)          | 4 (1.53)             | 3 (13.04)           | -                    | 0.000            | 0.000             |
| • The use of temperature-controlled equipment;                                                       | Correct   | 109 (66.46)         | 135 (82.32)          | 223 (85.44)         | 257 (98.47)          | 20 (86.96)          | 23 (100)             |                  |                   |
| • The transport of vaccines cannot be carried out with normal means of transport;                    | Missing   | 1 (0.60)            | 1 (0.60)             | -                   | -                    | -                   | -                    |                  |                   |
| • Constant temperature monitoring by drivers and control centres;                                    |           |                     |                      |                     |                      |                     |                      |                  |                   |
| • A final report of the load temperatures along the entire route and during storage in the pharmacy; |           |                     |                      |                     |                      |                     |                      |                  |                   |
| • <i>All the above.</i>                                                                              |           |                     |                      |                     |                      |                     |                      |                  |                   |

Correct answers are in italics. \* Difference in the distribution of correct/incorrect answers between Faculties pre-course. \*\* Difference in the distribution of correct/incorrect answers between Faculties post-course.

**Table S7.** Topic “Pharmacovigilance of vaccines”: test results pre- e post-course.

| Questions n. 19-21                                                                                                                                                                                                                                                                                                                                        | Answers   | Pharmacy            |                      | Medicine            |                      | Hygiene             |                      | <i>p-value</i> * | <i>p-value</i> ** |
|-----------------------------------------------------------------------------------------------------------------------------------------------------------------------------------------------------------------------------------------------------------------------------------------------------------------------------------------------------------|-----------|---------------------|----------------------|---------------------|----------------------|---------------------|----------------------|------------------|-------------------|
|                                                                                                                                                                                                                                                                                                                                                           |           | Pre-course<br>N (%) | Post-course<br>N (%) | Pre-course<br>N (%) | Post-course<br>N (%) | Pre-course<br>N (%) | Post-course<br>N (%) |                  |                   |
| <ul style="list-style-type: none"> <li>• AEFI stands for: <ul style="list-style-type: none"> <li>• Association of Italian Exhibitions and Fairs [Associazione Esposizioni e Fiere Italiane];</li> <li>• Adverse Events Following Injection;</li> <li>• <i>Adverse Events Following Immunisation</i>;</li> <li>• None of the above.</li> </ul> </li> </ul> | Incorrect | 47 (28.83)          | 2 (1.21)             | 67 (25.67)          | 6 (2.30)             | 5 (21.74)           | -                    | 0.667            | 0.571             |
|                                                                                                                                                                                                                                                                                                                                                           | Correct   | 116 (71.17)         | 163 (98.79)          | 194 (74.33)         | 255 (97.70)          | 18 (78.26)          | 23 (100)             |                  |                   |
|                                                                                                                                                                                                                                                                                                                                                           | Missing   | 2 (1.21)            | -                    | -                   | -                    | -                   | -                    |                  |                   |
|                                                                                                                                                                                                                                                                                                                                                           |           |                     |                      |                     |                      |                     |                      |                  |                   |
| Which of these features is NOT used to classify an AEFI: <ul style="list-style-type: none"> <li>• <i>Errors in vaccination</i>;</li> <li>• Age of the patient;</li> <li>• Defects in the quality of the vaccine;</li> <li>• Characteristics of the vaccine.</li> </ul>                                                                                    | Incorrect | 102 (61.82)         | 73 (44.51)           | 170 (65.13)         | 18 (6.90)            | 7 (30.43)           | 2 (8.70)             | 0.004            | 0.000             |
|                                                                                                                                                                                                                                                                                                                                                           | Correct   | 63 (38.18)          | 91 (55.49)           | 91 (34.87)          | 243 (93.10)          | 16 (69.57)          | 21 (91.30)           |                  |                   |
|                                                                                                                                                                                                                                                                                                                                                           | Missing   | -                   | 1 (0.60)             | -                   | -                    | -                   | -                    |                  |                   |
|                                                                                                                                                                                                                                                                                                                                                           |           |                     |                      |                     |                      |                     |                      |                  |                   |
| To perform the causality assessment of an AEFI. The following is used: <ul style="list-style-type: none"> <li>• CIOMS/RUCAM algorithm;</li> <li>• Schumock &amp; Thornton algorithm;</li> <li>• Naranjo scale;</li> <li>• <i>WHO algorithm</i>.</li> </ul>                                                                                                | Incorrect | 82 (52.90)          | 25 (15.24)           | 108 (41.38)         | 16 (6.13)            | 8 (34.78)           | 2 (8.70)             | 0.165            | 0.008             |
|                                                                                                                                                                                                                                                                                                                                                           | Correct   | 73 (47.10)          | 139 (84.76)          | 131 (50.19)         | 245 (93.87)          | 15 (65.22)          | 21 (91.30)           |                  |                   |
|                                                                                                                                                                                                                                                                                                                                                           | Missing   | 10 (6.06)           | 1 (0.60)             | 22 (8.43)           | -                    | -                   | -                    |                  |                   |
|                                                                                                                                                                                                                                                                                                                                                           |           |                     |                      |                     |                      |                     |                      |                  |                   |

Correct answers are in italics. \* Difference in the distribution of correct/incorrect answers between Faculties pre-course. \*\* Difference in the distribution of correct/incorrect answers between Faculties post-course.

**Table S8.** Topic “False myths on vaccines”: test results pre- e post-course.

| Questions n. 22-24 |                                                                                                                                                         | Answers                                                                                                                 | Pharmacy            |                      | Medicine            |                      | Hygiene             |                      | p-value * | p-value ** |             |
|--------------------|---------------------------------------------------------------------------------------------------------------------------------------------------------|-------------------------------------------------------------------------------------------------------------------------|---------------------|----------------------|---------------------|----------------------|---------------------|----------------------|-----------|------------|-------------|
|                    |                                                                                                                                                         |                                                                                                                         | Pre-course<br>N (%) | Post-course<br>N (%) | Pre-course<br>N (%) | Post-course<br>N (%) | Pre-course<br>N (%) | Post-course<br>N (%) |           |            |             |
| •                  | Which of the following statements is correct?<br><i>Formaldehyde is contained in a small number of vaccines but in minimal quantities (&lt;0.1 mg);</i> | Incorrect                                                                                                               | 85<br>(52.15)       | 13<br>(7.98)         | 89<br>(34.10)       | 9<br>(3.45)          | 3<br>(13.04)        | 2<br>(8.70)          | 0.001     | 0.101      |             |
|                    | •                                                                                                                                                       | Formaldehyde is used in vaccines as an adjuvant;                                                                        | Correct             | 78 (47.85)           | 150 (92.02)         | 168 (64.37)          | 252<br>(96.55)      | 20 (86.06)           |           |            | 21 (91.30)  |
|                    | •                                                                                                                                                       | The same amount of formaldehyde produced by an infant is present in vaccines;                                           | Missing             | 2 (1.21)             | 2 (1.21)            | 4 (1.53)             | -                   | -                    |           |            | -           |
| •                  | No vaccine contains formaldehyde.                                                                                                                       |                                                                                                                         |                     |                      |                     |                      |                     |                      |           |            |             |
| •                  | Which of the following statements is correct?<br>At two months the child’s immune system is not already able to respond to vaccination;                 | Incorrect                                                                                                               | 106 (65.84)         | 13<br>(7.93)         | 99 (37.93)          | 10<br>(3.83)         | 5<br>(21.74)        | -                    | 0.000     | 0.092      |             |
|                    | •                                                                                                                                                       | Vaccines weaken the immune system if administered too early;                                                            | Correct             | 55 (34.16)           | 151 (92.07)         | 162 (62.07)          | 251 (96.17)         | 18 (78.26)           |           |            | 23<br>(100) |
|                    | •                                                                                                                                                       | The newborn’s immune system is fragile and cannot be subjected to more than ten vaccinations in the first year of life; | Missing             | 4 (2.45)             | 1 (0.60)            | -                    | -                   | -                    |           |            | -           |
| •                  | <i>The newborn’s immune system has great potential: it could respond to over 10.000 vaccines at the same time.</i>                                      |                                                                                                                         |                     |                      |                     |                      |                     |                      |           |            |             |
| •                  | Which of the following statements is correct?<br><i>Aluminium salts are used in vaccines to enhance immune response;</i>                                | Incorrect                                                                                                               | 58 (35.80)          | 6<br>(3.64)          | 55 (21.07)          | 4<br>(1.53)          | 3<br>(13.04)        | -                    | 0.001     | 0.272      |             |
|                    | •                                                                                                                                                       | Aluminium salts are used in vaccines as a preservative;                                                                 | Correct             | 104 (64.20)          | 159 (96.36)         | 206 (78.93)          | 257 (98.47)         | 20 (86.96)           |           |            | 23<br>(100) |
|                    | •                                                                                                                                                       | The aluminium injected into the muscle with vaccines enters the blood immediately;                                      | Missing             | 3 (1.82)             | -                   | -                    | -                   | -                    |           |            | -           |
| •                  | Vaccines must not contain aluminium salts.                                                                                                              |                                                                                                                         |                     |                      |                     |                      |                     |                      |           |            |             |

Correct answers are in italics. \* Difference in the distribution of correct/incorrect answers between Faculties pre-course. \*\* Difference in the distribution of correct/incorrect answers between Faculties post-course.



**Table S9.** Topic “Italian national immunization plan (NIP)”: test results pre- e post-course.

| Questions n. 25-27                                                                                                      | Answers   | Pharmacy            |                      | Medicine            |                      | Hygiene             |                      | <i>p-value</i> * | <i>p-value</i> ** |
|-------------------------------------------------------------------------------------------------------------------------|-----------|---------------------|----------------------|---------------------|----------------------|---------------------|----------------------|------------------|-------------------|
|                                                                                                                         |           | Pre-course<br>N (%) | Post-course<br>N (%) | Pre-course<br>N (%) | Post-course<br>N (%) | Pre-course<br>N (%) | Post-course<br>N (%) |                  |                   |
| According to the Italian National Immunization Plan 2017-19. which of these vaccinations are recommended in pregnancy?  | Incorrect | 57 (34.55)          | 17 (10.30)           | 74 (28.35)          | 5 (1.92)             | -                   | -                    | 0.003            | 0.000             |
| • <i>Influenza and diphtheria-tetanus-pertussis;</i>                                                                    | Correct   | 108 (65.45)         | 148 (89.70)          | 187 (71.65)         | 256 (98.08)          | 23 (100)            | 23 (100)             |                  |                   |
| • Hepatitis B;                                                                                                          | Missing   | -                   | -                    | -                   | -                    | -                   | -                    |                  |                   |
| • Varicella (Chickenpox);                                                                                               |           |                     |                      |                     |                      |                     |                      |                  |                   |
| • Measles-Mumps-Rubella.                                                                                                |           |                     |                      |                     |                      |                     |                      |                  |                   |
| Which of the following vaccines are mandatory for school attendance under Law 119/2017 in Italy?                        | Incorrect | 28 (16.97)          | 6 (3.66)             | 22 (8.43)           | 2 (0.77)             | -                   | -                    | 0.005            | 0.073             |
| • Anti-pneumococcal;                                                                                                    | Correct   | 137 (83.03)         | 158 (96.34)          | 239 (91.57)         | 259 (99.23)          | 23 (100)            | 23 (100)             |                  |                   |
| • Anti-influenza;                                                                                                       | Missing   | -                   | 1 (0.60)             | -                   | -                    | -                   | -                    |                  |                   |
| • Hexavalent and MPRV;                                                                                                  |           |                     |                      |                     |                      |                     |                      |                  |                   |
| • Anti-meningococcal.                                                                                                   |           |                     |                      |                     |                      |                     |                      |                  |                   |
| The impact of vaccination programmes is assessed through:                                                               | Incorrect | 28 (17.18)          | 26 (15.76)           | 37 (14.18)          | 5 (1.92)             | 2 (8.70)            | -                    | 0.481            | 0.000             |
| • Monitoring the trend of mandatory disease notifications;                                                              | Correct   | 135 (82.82)         | 139 (84.24)          | 224 (85.82)         | 256 (98.08)          | 21 (91.30)          | 23 (100)             |                  |                   |
| • Monitoring of vaccination coverage;                                                                                   | Missing   | 2 (1.21)            | -                    | -                   | -                    | -                   | -                    |                  |                   |
| • The monitoring of the disease burden (notifications and hospitalizations) based on the vaccination coverage achieved; |           |                     |                      |                     |                      |                     |                      |                  |                   |
| • Monitoring the hospitalizations trend.                                                                                |           |                     |                      |                     |                      |                     |                      |                  |                   |

Correct answers are in italics. \* Difference in the distribution of correct/incorrect answers between Faculties pre-course. \*\* Difference in the distribution of correct/incorrect answers between Faculties post-course.

**Table S10.** Topic “HTA”: test results pre- e post-course.

| Questions n. 28-30                                                            | Answers   | Pharmacy            |                      | Medicine            |                      | Hygiene             |                      | <i>p-value</i> * | <i>p-value</i> ** |
|-------------------------------------------------------------------------------|-----------|---------------------|----------------------|---------------------|----------------------|---------------------|----------------------|------------------|-------------------|
|                                                                               |           | Pre-course<br>N (%) | Post-course<br>N (%) | Pre-course<br>N (%) | Post-course<br>N (%) | Pre-course<br>N (%) | Post-course<br>N (%) |                  |                   |
| A vaccine. To be included in the National Plan for Vaccine Prevention and.    | Incorrect | 34 (20.61)          | 4 (2.45)             | 20 (7.66)           | 1 (0.38)             | -                   | -                    | 0.000            | 0.125             |
| Therefore. Be offered actively and free of charge:                            | Correct   | 131 (79.39)         | 159 (97.55)          | 241 (92.34)         | 260 (99.62)          | 23 (100)            | 23 (100)             |                  |                   |
| • <i>Must be assessed according to the HTA approach;</i>                      | Missing   | -                   | 2 (1.21)             | -                   | -                    | -                   | -                    |                  |                   |
| • It is sufficient that it is not too expensive;                              |           |                     |                      |                     |                      |                     |                      |                  |                   |
| • It is sufficient that has proven effective;                                 |           |                     |                      |                     |                      |                     |                      |                  |                   |
| • It is sufficient that it has been shown to be safe.                         |           |                     |                      |                     |                      |                     |                      |                  |                   |
| The HTA applied to vaccinations includes assessing:                           | Incorrect | 41 (25.15)          | 2 (1.21)             | 36 (13.79)          | 1 (0.38)             | -                   | -                    | 0.001            | 0.539             |
| • Organisational aspects;                                                     | Correct   | 122 (74.85)         | 161 (98.77)          | 255 (86.21)         | (99.62)              | 23 (100)            | 23 (100)             |                  |                   |
| • The ethical aspects;                                                        | Missing   | 2 (1.21)            | 2 (1.21)             | -                   | -                    | -                   | -                    |                  |                   |
| • Possible alternative interventions;                                         |           |                     |                      |                     |                      |                     |                      |                  |                   |
| • <i>All the above.</i>                                                       |           |                     |                      |                     |                      |                     |                      |                  |                   |
| The economic evaluations of vaccinations show that:                           | Incorrect | 42 (25.77)          | 11 (6.75)            | 21 (8.05)           | 2 (0.71)             | -                   | 1 (4.35)             | 0.000            | 0.003             |
| • There is no need to carry out economic assessments for vaccination;         | Correct   | 121 (74.23)         | 152 (93.25)          | 240 (91.95)         | 259 (99.23)          | 23 (100)            | 22 (95.65)           |                  |                   |
| • Only in some rare cases vaccination is cost-effective;                      | Missing   | 2 (1.21)            | 2 (1.21)             | -                   | -                    | -                   | -                    |                  |                   |
| • <i>Vaccinations are an investment for the NHS (National Health System);</i> |           |                     |                      |                     |                      |                     |                      |                  |                   |
| • Vaccinations are only a cost to the NHS.                                    |           |                     |                      |                     |                      |                     |                      |                  |                   |

Correct answers are in italics. \* Difference in the distribution of correct/incorrect answers between Faculties pre-course. \*\* Difference in the distribution of correct/incorrect answers between Faculties post-course.
